# Supplementary material
Source: PubMed Central journal article supplement (PMC4862704)
Supplement: IAI.00034-16_zii999091703so1.pdf [file IAI.00034-16_zii999091703so1.pdf]

**Legend for supplemental movie**

The supplemental movie shows progressive neurological symptoms of *R. typhi*-infected C57BL/6 RAG1<sup>-/-</sup> mice. The majority of mice show stroke-like symptoms in the beginning of disease, e.g. the head hanging to one side. As disease progresses the mice run in circles and finally are paralyzed in the hind legs and loose weight. The movie shows three mice at progressive stages of disease. Other mice show progressive motor disorders beginning with tremor progressing to hauling the hind legs and weight loss. After the onset of disease mice usually die within 10-20 days.
